# Supplementary material
Source: PubMed Central journal article supplement (PMC5360291)

SUPPLEMENTARY DATA

**Supplementary Table 1**

Definitions of chronic conditions used to define the number of serious comorbidities in the study.

| <u>Comorbidity</u>            | <u>ICD-9 Code</u>                                     | <u>Description</u>                                                                                                                                                           |
|-------------------------------|-------------------------------------------------------|------------------------------------------------------------------------------------------------------------------------------------------------------------------------------|
| <u>CAD/MI</u>                 | <u>410.x</u>                                          | <u>Acute myocardial infarction</u>                                                                                                                                           |
|                               | <u>411.x</u>                                          | <u>Other acute and subacute forms of ischemic heart disease</u>                                                                                                              |
|                               | <u>412.x</u>                                          | <u>Old myocardial infarction</u>                                                                                                                                             |
|                               | <u>413.x</u>                                          | <u>Angina pectoris</u>                                                                                                                                                       |
|                               | <u>414.x</u>                                          | <u>Other forms of chronic ischemic heart disease</u>                                                                                                                         |
| <u>Chronic Lung Disease</u>   | <u>416.8, 416.9</u>                                   | <u>Chronic pulmonary heart diseases</u>                                                                                                                                      |
|                               | <u>490.x-505.x</u>                                    | <u>Chronic obstructive pulmonary diseases, asthma, emphysema, bronchiectasis, allergic alveolitis, chronic airway obstruction, pneumoconiosis, asbestosis, pneumonopathy</u> |
|                               | <u>506.4</u>                                          | <u>Chronic respiratory conditions due to fumes and vapors</u>                                                                                                                |
|                               | <u>508.1, 508.2, 508.8</u>                            | <u>Chronic and other pulmonary manifestations due to radiation, respiratory conditions due to smoke inhalation or to other specified external agents</u>                     |
| <u>Chronic Kidney Disease</u> | <u>403.x</u>                                          | <u>Hypertensive chronic kidney disease</u>                                                                                                                                   |
|                               | <u>404.x</u>                                          | <u>Hypertensive heart and chronic kidney disease</u>                                                                                                                         |
|                               | <u>582.x</u>                                          | <u>Chronic glomerulonephritis</u>                                                                                                                                            |
|                               | <u>583.0-583.7</u>                                    | <u>Glomerulonephritis</u>                                                                                                                                                    |
|                               | <u>585.x</u>                                          | <u>Chronic kidney disease</u>                                                                                                                                                |
|                               | <u>586.x</u>                                          | <u>Renal failure, unspecified</u>                                                                                                                                            |
|                               | <u>588.0x</u>                                         | <u>Renal osteodystrophy</u>                                                                                                                                                  |
|                               | <u>V42.0x, V45.1x, V56.x</u>                          | <u>Kidney transplant, postsurgical renal dialysis status, dialysis and dialysis catheter care</u>                                                                            |
| <u>Heart Failure</u>          | <u>398.91</u>                                         |                                                                                                                                                                              |
|                               | <u>402.01, 402.11, 402.91</u>                         | <u>Hypertensive heart disease</u>                                                                                                                                            |
|                               | <u>404.01, 404.03, 404.11, 404.13, 404.91, 404.93</u> | <u>Hypertensive heart and chronic kidney disease, malignant, with heart failure</u>                                                                                          |

SUPPLEMENTARY DATA

|                            |                    |                                                                                                                                                                   |
|----------------------------|--------------------|-------------------------------------------------------------------------------------------------------------------------------------------------------------------|
|                            | <u>425.4-425.9</u> | <u>Other primary cardiomyopathy, alcoholic cardiomyopathy, nutrition and metabolic cardiomyopathy, cardiomyopathy in other diseases, secondary cardiomyopathy</u> |
|                            | <u>428.x</u>       | <u>Congestive heart failure</u>                                                                                                                                   |
| <u>Dementia</u>            | <u>290.x</u>       | <u>Dementias</u>                                                                                                                                                  |
|                            | <u>294.1x</u>      | <u>Dementia in conditions classified elsewhere</u>                                                                                                                |
|                            | <u>294.2x</u>      | <u>Dementia, unspecified</u>                                                                                                                                      |
|                            | <u>331.x</u>       | <u>Alzheimer's disease</u>                                                                                                                                        |
| <u>Depression</u>          | <u>296.2x</u>      | <u>Major depressive disorder</u>                                                                                                                                  |
|                            | <u>296.3x</u>      | <u>Major depressive disorder recurrent episode</u>                                                                                                                |
|                            | <u>311.x</u>       | <u>Depressive disorder, not elsewhere classified</u>                                                                                                              |
| <u>Atrial fibrillation</u> | <u>427.31</u>      | <u>Atrial fibrillation</u>                                                                                                                                        |
| <u>Stroke</u>              | <u>433.x1</u>      | <u>Occlusion and stenosis with cerebral infarction</u>                                                                                                            |
|                            | <u>434.x1</u>      | <u>Occlusion with cerebral infarction</u>                                                                                                                         |
|                            | <u>436.x</u>       | <u>Acute, but ill defined, cerebrovascular disease</u>                                                                                                            |

## SUPPLEMENTARY DATA

### Supplementary Table 2

Standardized proportion of privately insured patients with type 2 diabetes who filled each class of glucose-lowering agents, 2006-2013. All trend p-values are <0.001.

|                  | 2006  | 2007  | 2008  | 2009  | 2010  | 2011  | 2012  | 2013  |
|------------------|-------|-------|-------|-------|-------|-------|-------|-------|
| Biguanides       | 47.6% | 47.7% | 49.9% | 50.6% | 51.5% | 52.4% | 52.0% | 53.5% |
| Sulfonylureas    | 38.8% | 36.0% | 35.0% | 33.7% | 32.6% | 32.0% | 30.3% | 30.8% |
| TZDs             | 28.5% | 25.4% | 19.6% | 17.6% | 15.5% | 12.1% | 7.1%  | 5.6%  |
| Any insulin      | 17.1% | 16.9% | 18.2% | 19.4% | 20.0% | 20.9% | 21.4% | 23.0% |
| DPP-4 inhibitors | 0.5%  | 5.3%  | 8.2%  | 9.2%  | 10.4% | 13.0% | 14.5% | 14.9% |
| GLP-1 agonists   | 3.3%  | 3.7%  | 3.8%  | 3.2%  | 3.4%  | 4.0%  | 4.6%  | 5.0%  |
| Other            | 2.9%  | 2.5%  | 2.3%  | 2.1%  | 1.9%  | 1.6%  | 1.6%  | 2.2%  |
| None             | 25.7% | 27.9% | 26.4% | 26.3% | 25.9% | 24.6% | 25.9% | 24.1% |

SUPPLEMENTARY DATA

**Supplementary Table 3**

The mean number of days covered per patient per year for each class of oral glucose-lowering medications.

|                              | 2006   | 2007   | 2008   | 2009   | 2010   | 2011   | 2012   | 2013   | Trend p value |
|------------------------------|--------|--------|--------|--------|--------|--------|--------|--------|---------------|
| Biguanides                   | 241.97 | 236.27 | 238.25 | 238.58 | 240.42 | 245.19 | 251.50 | 250.86 | p<0.001       |
| Sulfonylureas                | 243.46 | 237.90 | 241.89 | 239.06 | 244.91 | 248.23 | 253.34 | 253.56 | p<0.001       |
| TZDs                         | 229.77 | 218.81 | 231.03 | 233.21 | 227.51 | 230.16 | 231.50 | 244.10 | p<0.001       |
| Meglitinides                 | 179.71 | 178.60 | 186.10 | 188.96 | 188.83 | 194.61 | 202.84 | 196.91 | p<0.001       |
| Alpha-glucosidase inhibitors | 177.38 | 177.08 | 179.57 | 177.82 | 173.20 | 178.61 | 188.62 | 190.53 | p=0.73        |
| DPP-4 inhibitors             | 48.61  | 146.10 | 198.23 | 217.38 | 211.16 | 211.82 | 223.79 | 220.87 | p<0.001       |
| Bromocriptine                |        |        |        |        | 45.40  | 117.65 | 145.18 | 180.59 | p<0.001       |
| SGLT-2 inhibitors            |        |        |        |        |        |        |        | 105.08 |               |
| GLP-1 agonists               | 142.72 | 158.69 | 172.74 | 177.17 | 165.88 | 176.93 | 184.17 | 185.39 | p<0.001       |
| Amylin analogs               | 107.28 | 122.57 | 119.82 | 128.41 | 130.24 | 129.96 | 138.97 | 149.51 | p<0.001       |

Note: The mean number of days covered for a drug class was calculated among patients who had at least 1 fill of drugs in this class in a particular year. The sum of number of days supplied for a patient for a drug class is capped at 365 days (in rare cases, patients' total days of supplied for a drug class is more than 365 days).

SUPPLEMENTARY DATA

**Supplementary Table 4**

Proportion of privately insured patients with type 2 diabetes who filled each class of glucose-lowering agents, 2006-2013, by age group. All trend p-values are <0.001.

A. Youngest adults (18-44 years)

|                  | 2006  | 2007  | 2008  | 2009  | 2010  | 2011  | 2012  | 2013  |
|------------------|-------|-------|-------|-------|-------|-------|-------|-------|
| N                | 57559 | 63209 | 62865 | 63014 | 60165 | 59618 | 58116 | 56097 |
| Biguanides       | 55.5% | 53.3% | 54.9% | 55.4% | 55.8% | 55.3% | 55.1% | 55.4% |
| Sulfonylureas    | 32.7% | 28.9% | 28.3% | 27.1% | 25.9% | 25.2% | 25.0% | 24.5% |
| TZDs             | 30.9% | 24.9% | 18.9% | 16.8% | 14.4% | 10.3% | 5.6%  | 4.2%  |
| Any insulin      | 21.1% | 20.5% | 21.9% | 23.2% | 23.2% | 23.6% | 24.1% | 24.5% |
| DPP-4 inhibitors | 0.5%  | 5.9%  | 9.2%  | 10.4% | 11.4% | 13.8% | 15.1% | 14.5% |
| GLP-1 agonists   | 6.0%  | 6.5%  | 6.6%  | 5.6%  | 6.3%  | 7.5%  | 8.3%  | 8.7%  |
| Other            | 3.0%  | 2.4%  | 2.0%  | 1.8%  | 1.6%  | 1.5%  | 1.3%  | 2.6%  |
| None             | 18.7% | 23.6% | 22.5% | 22.0% | 22.1% | 22.4% | 22.7% | 22.8% |

B. Middle age adults (45-64 years)

|                  | 2006   | 2007   | 2008   | 2009   | 2010   | 2011   | 2012   | 2013   |
|------------------|--------|--------|--------|--------|--------|--------|--------|--------|
| N                | 225937 | 251833 | 257767 | 270877 | 271899 | 283093 | 283764 | 287884 |
| Biguanides       | 59.0%  | 57.0%  | 60.1%  | 59.7%  | 59.7%  | 59.7%  | 59.6%  | 60.3%  |
| Sulfonylureas    | 40.2%  | 35.7%  | 35.1%  | 33.2%  | 31.4%  | 30.2%  | 29.1%  | 28.8%  |
| TZDs             | 36.8%  | 31.3%  | 24.7%  | 22.4%  | 19.4%  | 15.2%  | 8.9%   | 6.8%   |
| Any insulin      | 16.7%  | 16.5%  | 18.4%  | 19.8%  | 20.5%  | 21.4%  | 22.5%  | 23.7%  |
| DPP-4 inhibitors | 0.7%   | 7.1%   | 11.2%  | 12.7%  | 13.8%  | 16.4%  | 18.3%  | 17.8%  |
| GLP-1 agonists   | 5.3%   | 6.1%   | 6.1%   | 5.1%   | 5.5%   | 6.3%   | 7.1%   | 7.5%   |
| Other            | 3.6%   | 2.9%   | 2.6%   | 2.3%   | 2.0%   | 1.7%   | 1.8%   | 3.0%   |
| None             | 18.3%  | 23.1%  | 20.3%  | 20.6%  | 21.0%  | 21.1%  | 21.6%  | 21.0%  |

C. Older adults (65-74 years)

|                  | 2006  | 2007  | 2008  | 2009   | 2010   | 2011   | 2012   | 2013   |
|------------------|-------|-------|-------|--------|--------|--------|--------|--------|
| N                | 57133 | 73930 | 83146 | 114587 | 148554 | 171560 | 195576 | 204045 |
| Biguanides       | 43.9% | 46.0% | 47.8% | 49.4%  | 50.9%  | 52.8%  | 52.1%  | 54.4%  |
| Sulfonylureas    | 39.4% | 37.7% | 36.4% | 35.4%  | 34.7%  | 34.5%  | 32.2%  | 33.9%  |
| TZDs             | 25.7% | 24.3% | 18.4% | 16.2%  | 14.3%  | 11.3%  | 6.6%   | 5.5%   |
| Any insulin      | 16.4% | 16.4% | 17.7% | 19.2%  | 19.9%  | 20.9%  | 21.2%  | 23.6%  |
| DPP-4 inhibitors | 0.4%  | 4.7%  | 6.8%  | 7.3%   | 8.6%   | 11.3%  | 12.7%  | 14.1%  |
| GLP-1 agonists   | 2.0%  | 2.1%  | 2.2%  | 1.9%   | 1.9%   | 2.3%   | 2.8%   | 3.4%   |
| Other            | 2.6%  | 2.5%  | 2.3%  | 1.9%   | 1.6%   | 1.4%   | 1.3%   | 1.8%   |
| None             | 29.2% | 29.1% | 28.3% | 27.7%  | 26.8%  | 24.5%  | 26.3%  | 22.9%  |

SUPPLEMENTARY DATA

D. Oldest adults (75 years and older)

|                  | 2006  | 2007  | 2008  | 2009  | 2010   | 2011   | 2012   | 2013   |
|------------------|-------|-------|-------|-------|--------|--------|--------|--------|
| N                | 44335 | 58662 | 65750 | 89761 | 112804 | 128546 | 144854 | 152091 |
| Biguanides       | 27.9% | 30.1% | 31.3% | 33.0% | 35.0%  | 37.2%  | 36.5%  | 38.4%  |
| Sulfonylureas    | 37.9% | 36.8% | 35.6% | 34.6% | 34.4%  | 34.6%  | 32.0%  | 32.9%  |
| TZDs             | 15.8% | 16.0% | 11.9% | 10.6% | 9.7%   | 8.0%   | 4.8%   | 4.1%   |
| Any insulin      | 17.2% | 17.2% | 17.4% | 17.8% | 18.1%  | 18.9%  | 18.7%  | 20.4%  |
| DPP-4 inhibitors | 0.1%  | 2.6%  | 4.1%  | 4.8%  | 5.9%   | 8.3%   | 9.3%   | 10.8%  |
| GLP-1 agonists   | 0.4%  | 0.4%  | 0.4%  | 0.4%  | 0.4%   | 0.6%   | 0.7%   | 1.0%   |
| Other            | 2.0%  | 2.1%  | 2.1%  | 1.8%  | 1.8%   | 1.7%   | 1.4%   | 1.7%   |
| None             | 37.3% | 36.7% | 36.8% | 36.7% | 35.3%  | 32.4%  | 35.0%  | 32.1%  |

SUPPLEMENTARY DATA

**Supplementary Table 5**

Proportion of privately insured patients with type 2 diabetes who filled each class of glucose-lowering agents, 2006-2013, by subgroup based on the number of other serious comorbidities. All trend p-values are <0.001.

A. No other serious comorbidities

|                  | 2006   | 2007   | 2008   | 2009   | 2010   | 2011   | 2012   | 2013   |
|------------------|--------|--------|--------|--------|--------|--------|--------|--------|
| N                | 238317 | 271478 | 276820 | 300478 | 320297 | 341623 | 355550 | 358899 |
| Biguanides       | 57.1%  | 55.6%  | 58.3%  | 58.0%  | 58.0%  | 58.4%  | 58.1%  | 59.4%  |
| Sulfonylureas    | 39.3%  | 35.5%  | 34.4%  | 32.8%  | 31.5%  | 30.9%  | 29.7%  | 30.2%  |
| TZDs             | 33.9%  | 29.1%  | 22.9%  | 20.4%  | 17.5%  | 13.6%  | 8.0%   | 6.2%   |
| Any insulin      | 14.8%  | 14.4%  | 15.5%  | 16.1%  | 16.1%  | 16.7%  | 17.1%  | 18.3%  |
| DPP-4 inhibitors | 0.6%   | 6.1%   | 9.6%   | 10.6%  | 11.5%  | 13.9%  | 15.6%  | 15.8%  |
| GLP-1 agonists   | 4.3%   | 4.9%   | 5.0%   | 4.1%   | 4.2%   | 4.7%   | 5.2%   | 5.6%   |
| Other            | 3.0%   | 2.4%   | 2.2%   | 1.9%   | 1.6%   | 1.5%   | 1.4%   | 2.3%   |
| None             | 20.4%  | 24.6%  | 23.0%  | 23.7%  | 24.5%  | 24.0%  | 25.2%  | 23.9%  |

B. One other serious comorbidity

|                  | 2006  | 2007   | 2008   | 2009   | 2010   | 2011   | 2012   | 2013   |
|------------------|-------|--------|--------|--------|--------|--------|--------|--------|
| N                | 89475 | 105010 | 114549 | 135927 | 153066 | 166837 | 178000 | 183567 |
| Biguanides       | 50.4% | 49.6%  | 51.7%  | 51.5%  | 51.8%  | 52.6%  | 51.7%  | 53.4%  |
| Sulfonylureas    | 37.1% | 34.3%  | 34.2%  | 33.2%  | 32.6%  | 32.4%  | 30.7%  | 31.7%  |
| TZDs             | 30.8% | 26.6%  | 20.4%  | 18.0%  | 15.7%  | 12.4%  | 7.0%   | 5.8%   |
| Any insulin      | 17.9% | 17.6%  | 19.2%  | 20.1%  | 20.7%  | 21.4%  | 21.8%  | 23.4%  |
| DPP-4 inhibitors | 0.6%  | 6.2%   | 9.4%   | 9.9%   | 10.8%  | 13.3%  | 14.4%  | 15.0%  |
| GLP-1 agonists   | 4.9%  | 5.1%   | 4.9%   | 3.8%   | 3.9%   | 4.4%   | 4.7%   | 5.2%   |
| Other            | 3.3%  | 2.7%   | 2.6%   | 2.2%   | 1.9%   | 1.9%   | 1.7%   | 2.4%   |
| None             | 24.2% | 27.0%  | 25.0%  | 25.5%  | 25.3%  | 24.1%  | 25.8%  | 23.6%  |

C. Two or more other serious comorbidities

|                  | 2006  | 2007  | 2008  | 2009   | 2010   | 2011   | 2012   | 2013   |
|------------------|-------|-------|-------|--------|--------|--------|--------|--------|
| N                | 57172 | 71146 | 78159 | 101834 | 120059 | 134357 | 148760 | 157651 |
| Biguanides       | 37.4% | 36.3% | 37.5% | 38.1%  | 38.4%  | 39.4%  | 38.4%  | 40.0%  |
| Sulfonylureas    | 38.7% | 35.6% | 35.0% | 34.4%  | 33.8%  | 33.1%  | 31.0%  | 31.3%  |
| TZDs             | 24.9% | 21.3% | 15.3% | 13.2%  | 11.4%  | 8.7%   | 5.0%   | 4.0%   |
| Any insulin      | 27.4% | 27.1% | 28.7% | 29.8%  | 30.3%  | 31.2%  | 31.6%  | 33.4%  |
| DPP-4 inhibitors | 0.5%  | 5.1%  | 7.6%  | 8.2%   | 8.9%   | 11.2%  | 12.2%  | 13.1%  |
| GLP-1 agonists   | 3.8%  | 3.4%  | 3.1%  | 2.4%   | 2.3%   | 2.6%   | 3.0%   | 3.4%   |
| Other            | 3.7%  | 3.3%  | 3.1%  | 2.5%   | 2.2%   | 2.0%   | 1.9%   | 2.2%   |
| None             | 26.5% | 29.6% | 28.3% | 28.1%  | 27.5%  | 25.8%  | 27.5%  | 25.2%  |

SUPPLEMENTARY DATA

**Supplementary Table 6**

Characteristics of patients with type 2 diabetes in the study with and without hemoglobin A1c level available in the dataset.

|                          | Without A1C    | With A1C      | P-value |
|--------------------------|----------------|---------------|---------|
| N                        | 292614         | 92749         |         |
| Age, years, median (IQR) | 57.0 (17.0)    | 57.0 (16.0)   | 0.433   |
| Age, years, N (%)        |                |               | <0.0001 |
| 18-44                    | 44334 (15.2%)  | 13225 (14.3%) |         |
| 45-54                    | 74389 (25.4%)  | 23905 (25.8%) |         |
| 55-64                    | 95633 (32.7%)  | 32010 (34.5%) |         |
| 65-74                    | 42828 (14.6%)  | 14305 (15.4%) |         |
| ≥ 75                     | 35430 (12.1%)  | 9304 (10.0%)  |         |
| Gender, N (%)            |                |               | <0.0001 |
| Female                   | 139137 (47.5%) | 43201 (46.6%) |         |
| Male                     | 153477 (52.5%) | 49548 (53.4%) |         |
| Race, N(%)               |                |               | <0.0001 |
| Asian                    | 10528 (3.6%)   | 5462 (5.9%)   |         |
| Black                    | 27684 (9.5%)   | 9333 (10.1%)  |         |
| Hispanic                 | 29765 (10.2%)  | 10489 (11.3%) |         |
| Unknown                  | 35962 (12.3%)  | 12188 (13.1%) |         |
| White                    | 188675 (64.5%) | 55277 (59.6%) |         |
| Household Income, N(%)   |                |               | <0.0001 |
| <40k                     | 43521 (14.9%)  | 12418 (13.4%) |         |
| 40k-49k                  | 15487 (5.3%)   | 4664 (5.0%)   |         |
| 50k-59k                  | 14468 (4.9%)   | 4607 (5.0%)   |         |
| 60k-74k                  | 19395 (6.6%)   | 6444 (6.9%)   |         |
| 75k-99k                  | 25283 (8.6%)   | 9158 (9.9%)   |         |
| 100k+                    | 46732 (16.0%)  | 19582 (21.1%) |         |
| Unknown                  | 127728 (43.7%) | 35876 (38.7%) |         |
| Region, N(%)             |                |               | <0.0001 |
| Midwest                  | 80858 (27.6%)  | 15369 (16.6%) |         |
| Northeast                | 41542 (14.2%)  | 32011 (34.5%) |         |
| South                    | 112692 (38.5%) | 41947 (45.2%) |         |
| Unknown                  | 2874 (1.0%)    | 558 (0.6%)    |         |
| West                     | 54648 (18.7%)  | 2864 (3.1%)   |         |
| Comorbidities, N(%)      |                |               |         |
| CAD/MI                   | 52169 (17.8%)  | 19983 (21.5%) | <0.0001 |
| CHF                      | 24401 (8.3%)   | 7376 (8.0%)   | 0.0002  |
| Chronic Lung Disease     | 40062 (13.7%)  | 13081 (14.1%) | 0.0015  |
| Chronic Kidney Disease   | 18114 (6.2%)   | 5438 (5.9%)   | 0.0003  |
| Cancer                   | 18481 (6.3%)   | 6539 (7.1%)   | <0.0001 |
| Depression               | 18772 (6.4%)   | 4888 (5.3%)   | <0.0001 |
| Dementia                 | 7838 (2.7%)    | 1226 (1.3%)   | <0.0001 |
| Stroke                   | 8750 (3.0%)    | 2442 (2.6%)   | <0.0001 |
| Atrial fibrillation      | 13504 (4.6%)   | 3851 (4.2%)   | <0.0001 |
| Arthritis                | 47659 (16.3%)  | 15908 (17.2%) | <0.0001 |



SUPPLEMENTARY DATA

Supplementary Figure 1

Glycemic control among patients with type 2 diabetes by age subgroup.

A. Youngest adults (18-44 years)

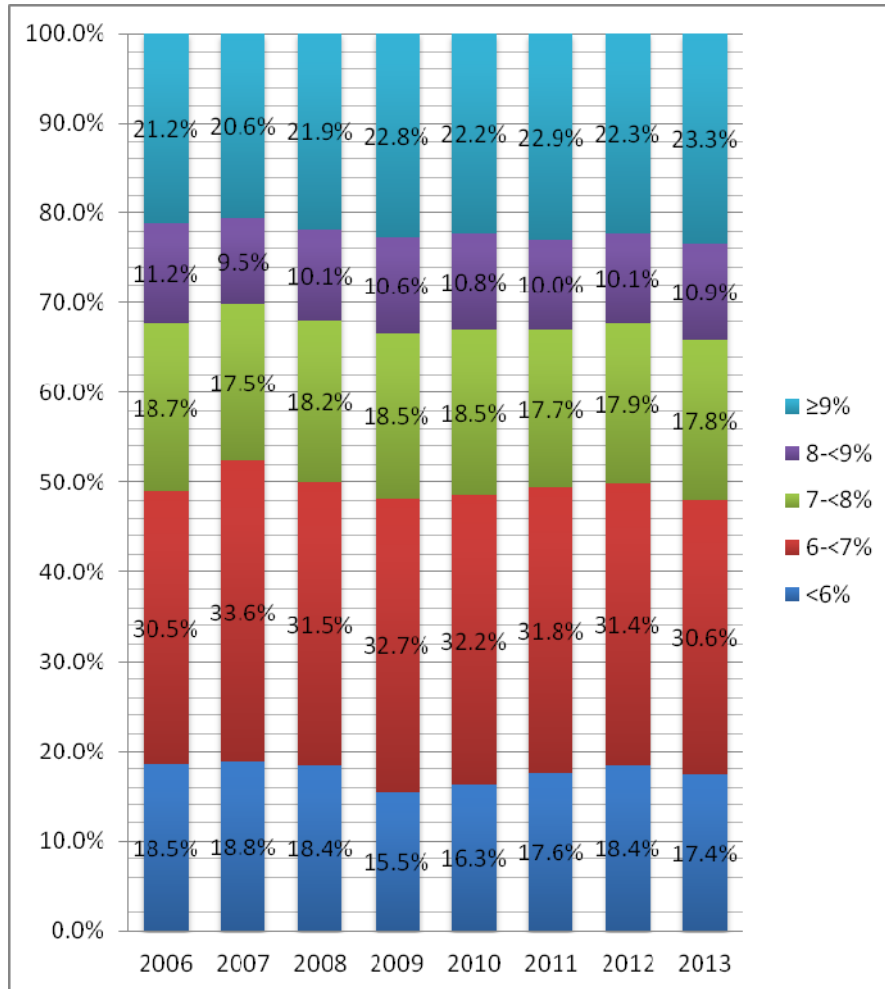

SUPPLEMENTARY DATA

B. Middle age adults (45-64 years)

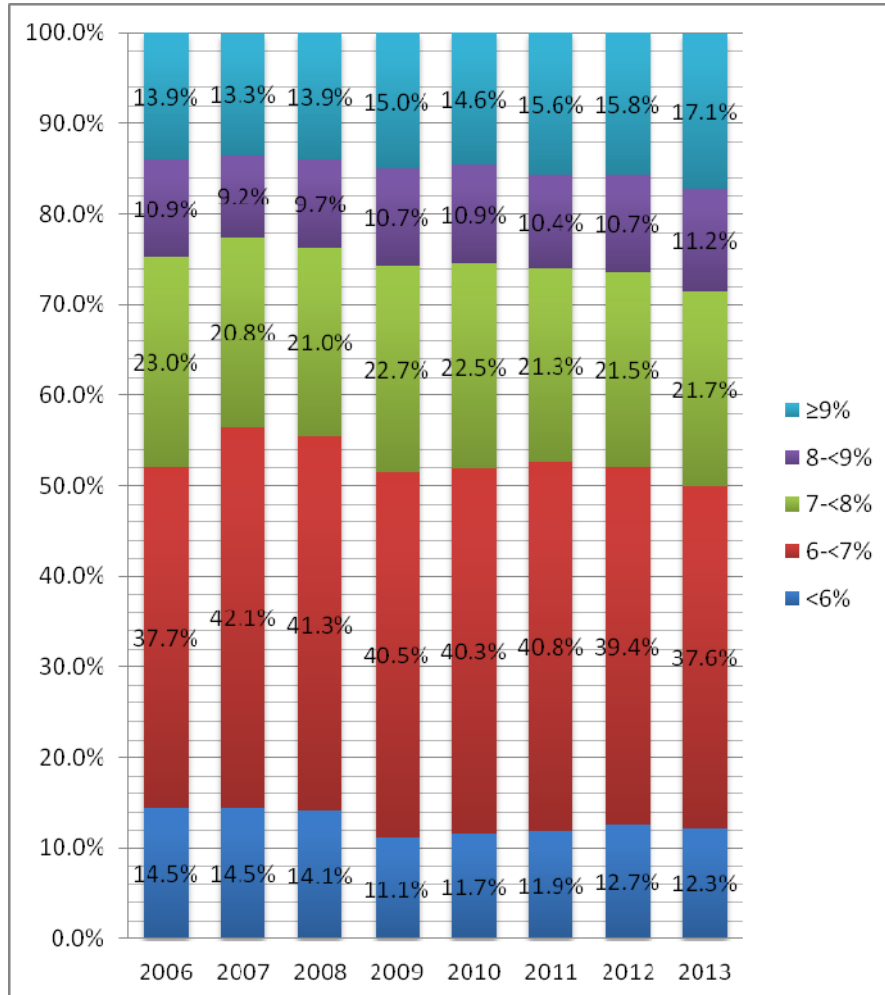

SUPPLEMENTARY DATA

C. Older adults (65-74 years)

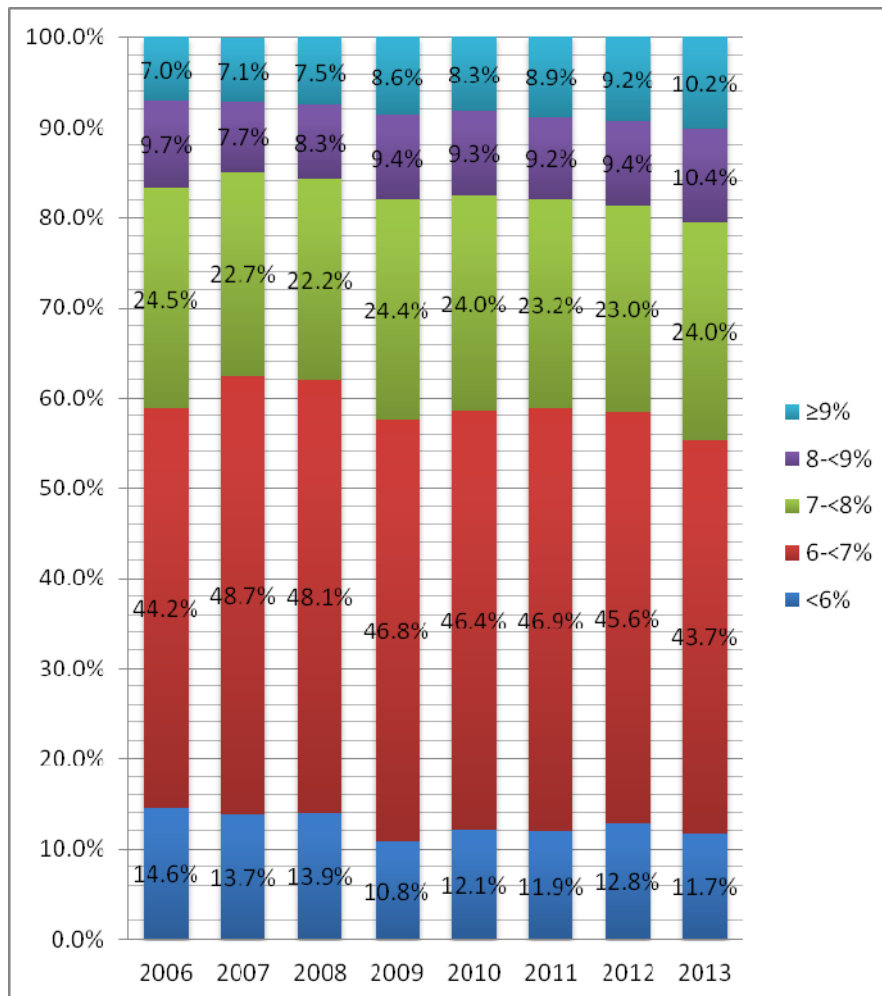

SUPPLEMENTARY DATA

D. Oldest adults (75 years and older)

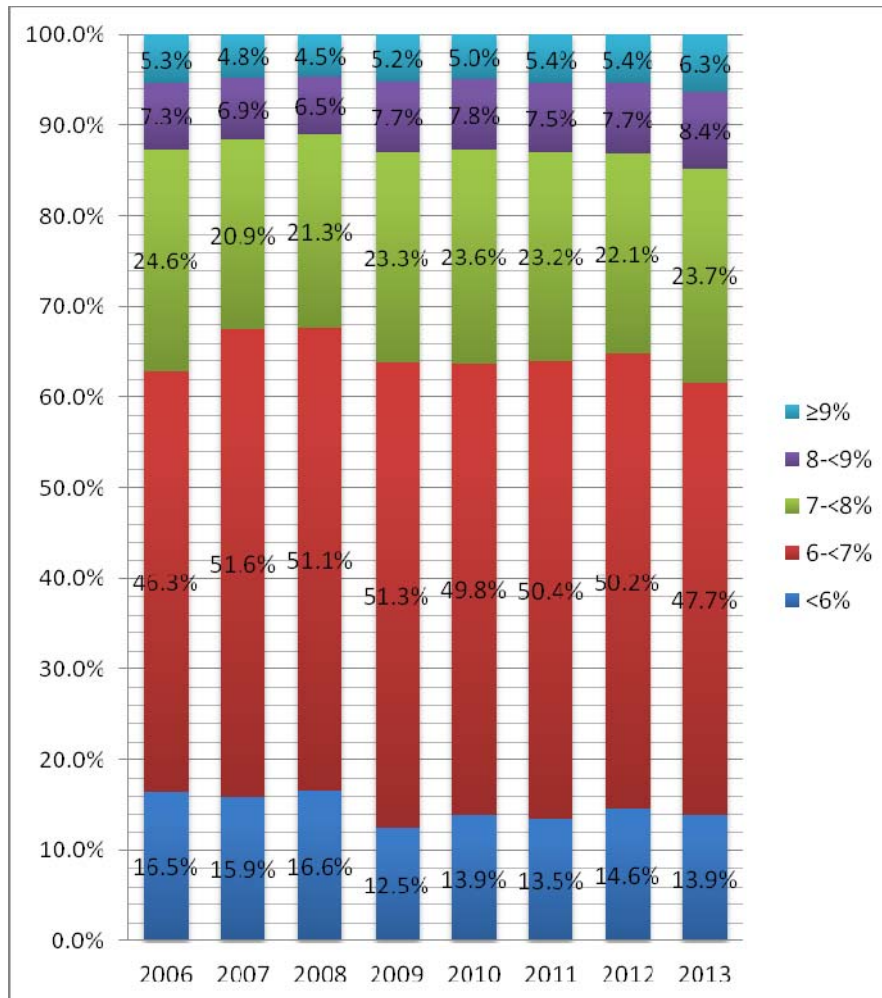

SUPPLEMENTARY DATA

Supplementary Figure 2

Glycemic control among patients with type 2 diabetes by comorbidity subgroup.

A. No other serious comorbidities

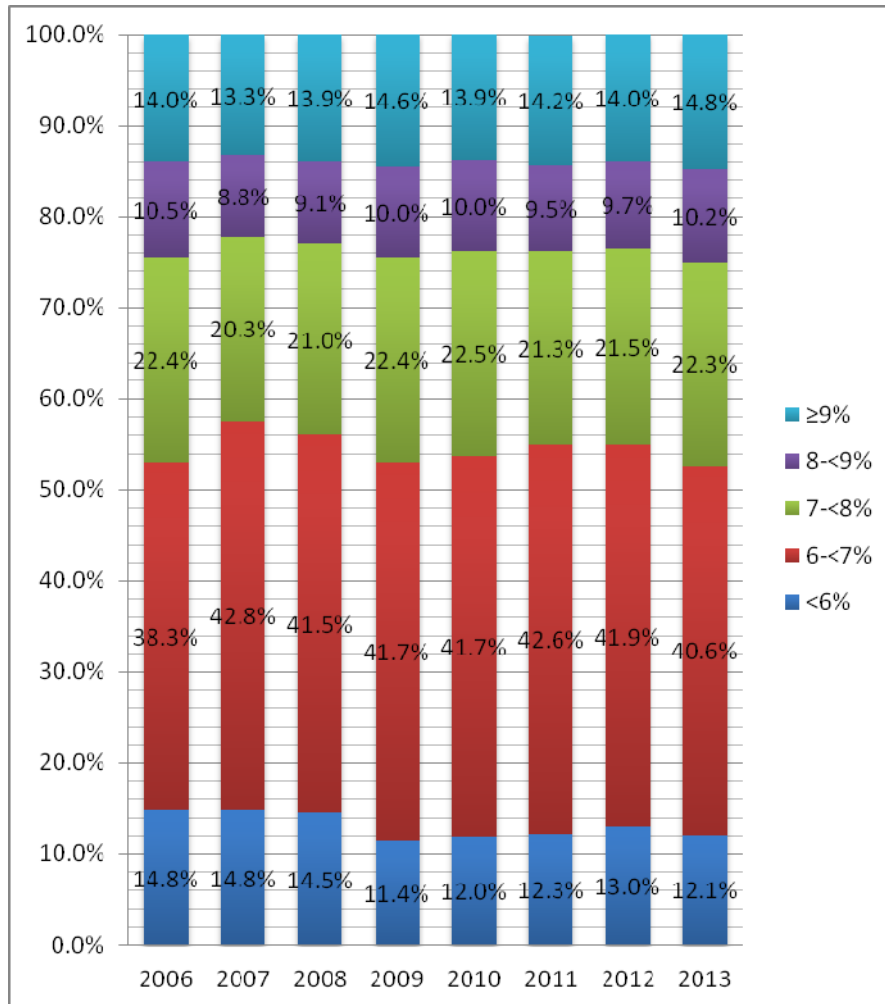

SUPPLEMENTARY DATA

Supplementary Figure 3

Rates of severe hypoglycemia among patients with type 2 diabetes who filled at least one glucose-lowering agent, by age subgroup.

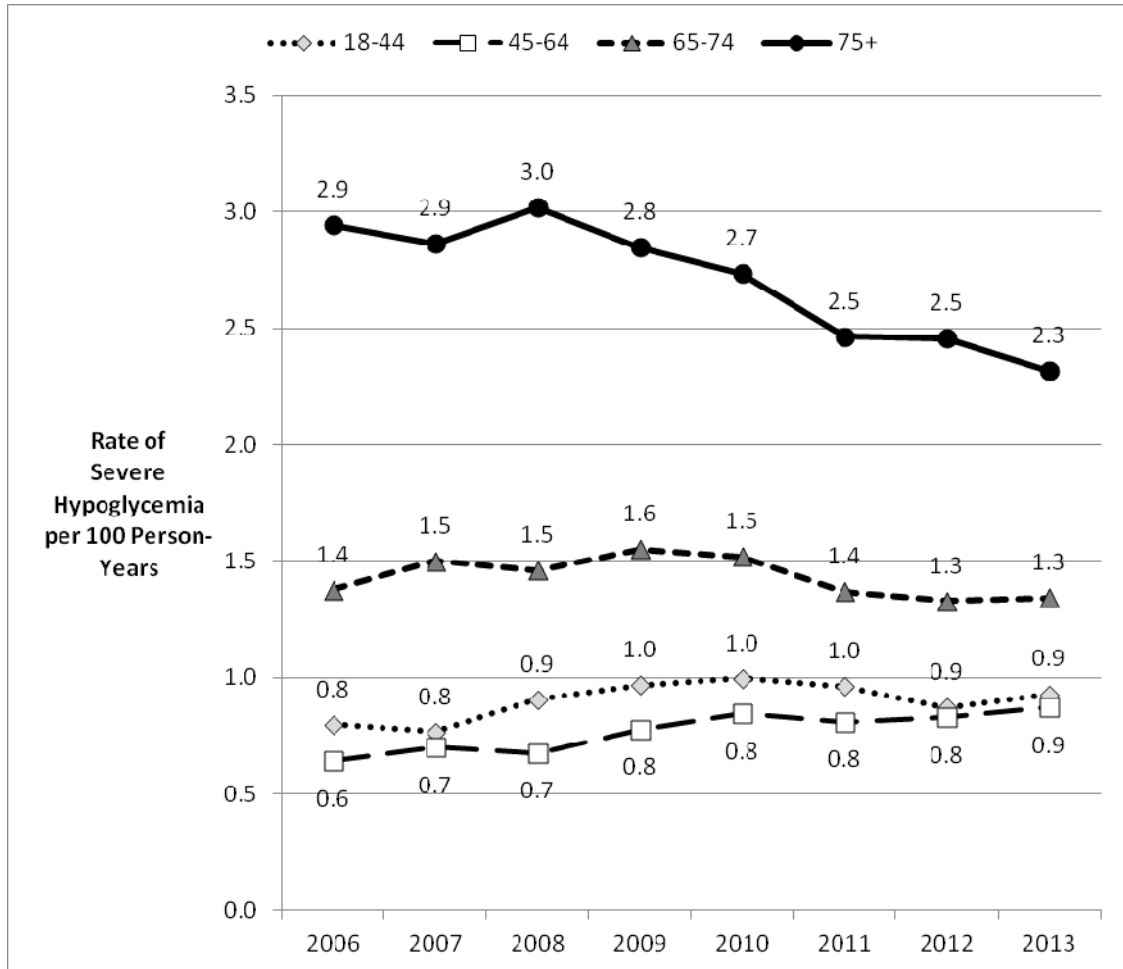

SUPPLEMENTARY DATA

Supplementary Figure 4

Rates of severe hypoglycemia among patients with type 2 diabetes who filled at least one glucose-lowering agent, by comorbidity subgroup.

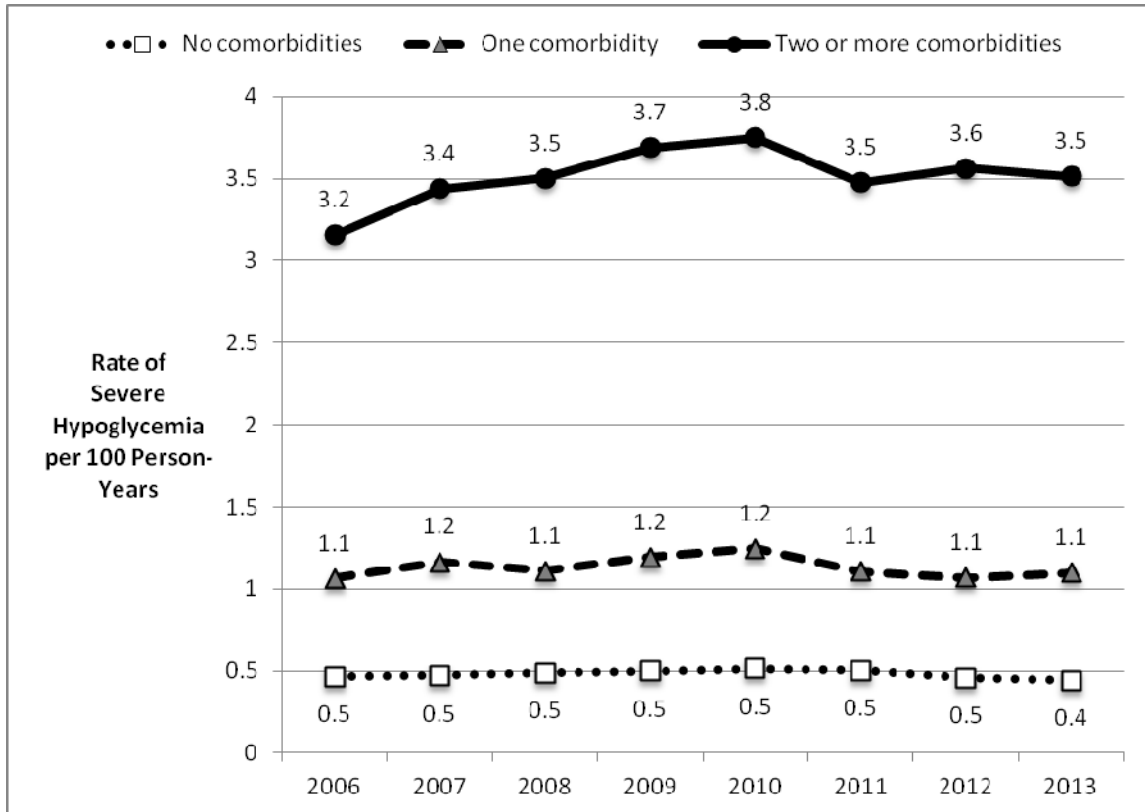

SUPPLEMENTARY DATA

**Supplementary Table 7**

Sensitivity analysis: Proportion of patients with type 2 diabetes in each glycemic control category, with only one year of data per patient (the year for each patient was selected at random).

|                            | 2006  | 2007  | 2008  | 2009  | 2010  | 2011  | 2012  | 2013   | Trend<br>p-value |
|----------------------------|-------|-------|-------|-------|-------|-------|-------|--------|------------------|
| N                          | 60130 | 38545 | 55958 | 66238 | 68841 | 72235 | 79194 | 136368 |                  |
| Percent of original cohort | 64.9% | 49.1% | 46.9% | 45.4% | 44.6% | 44.4% | 46.8% | 62.7%  |                  |
| HbA1c                      |       |       |       |       |       |       |       |        |                  |
| <6%                        | 16.5% | 16.0% | 16.5% | 12.8% | 13.9% | 14.1% | 15.0% | 13.9%  | <0.0001          |
| 6-<7%                      | 40.5% | 44.9% | 44.1% | 43.7% | 43.4% | 44.4% | 43.2% | 41.1%  | 0.0154           |
| 7-<8%                      | 23.1% | 20.5% | 20.4% | 22.5% | 22.4% | 21.1% | 21.3% | 22.3%  | 0.2476           |
| 8-<9%                      | 9.7%  | 8.3%  | 8.6%  | 9.5%  | 9.8%  | 9.1%  | 9.3%  | 10.4%  | <0.0001          |
| ≥9%                        | 10.2% | 10.2% | 10.3% | 11.5% | 10.5% | 11.3% | 11.3% | 12.4%  | <0.0001          |



SUPPLEMENTARY DATA

**Supplementary Figure 5**

Sensitivity analysis: Adjusted rate of severe hypoglycemia among patients with type 2 diabetes who filled at least one glucose-lowering drug, with only one year of data per patient (the year for each patient was selected at random).

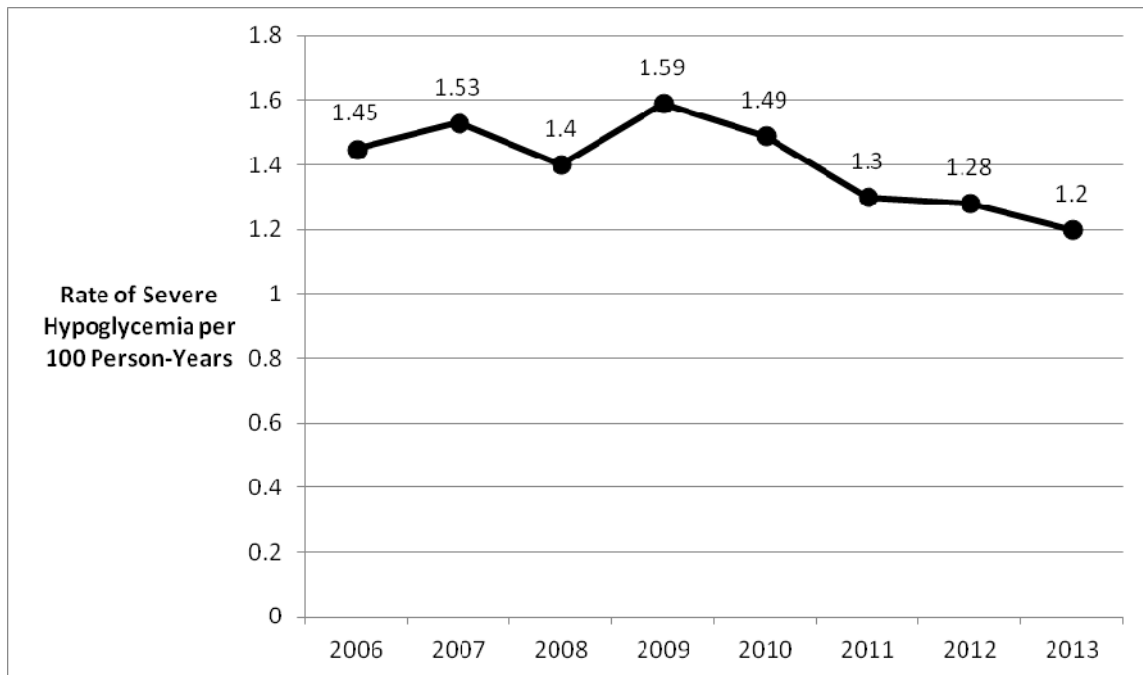

Supplement: DC160985SupplementaryData.pdf [file DC160985SupplementaryData.pdf]
